# Supplementary material for: A Comprehensive Study of the Quality of Fat-Tailed Sheep Carcasses in Greece
Source: MDPI journal article supplement (doi:10.3390/ani12151998), 2022-08-07
Supplement: s1 [file s1]

**Table S1a.** Effects of sheep population (fat-tailed or thin-tailed sheep), live-weight category (LWC—% of mature live weight) and their interaction on studied traits, as estimated based on two-way ANOVA.

| Trait                      | Effect                 | Sum of squares | df | Mean Square  | F      | P-value |
|----------------------------|------------------------|----------------|----|--------------|--------|---------|
| <b>Wither height (m)</b>   | Sheep population       | 0.01           | 1  | 0.01         | 5.53   | <0.05   |
|                            | LWC                    | 2.28           | 4  | 0.57         | 269.96 | <0.001  |
|                            | Sheep population × LWC | 0.03           | 4  | 0.01         | 3.45   | <0.01   |
| <b>Yellowness - b*</b>     | Sheep population       | 0.03           | 1  | 0.03         | 0.03   | 0.871   |
|                            | LWC                    | 3.53           | 4  | 0.88         | 0.77   | 0.549   |
|                            | Sheep population × LWC | 11.80          | 4  | 2.95         | 2.56   | <0.05   |
| <b>Hue angle</b>           | Sheep population       | 0.00           | 1  | 0.00         | 1.04   | 0.311   |
|                            | LWC                    | 0.02           | 4  | 0.01         | 1.65   | 0.170   |
|                            | Sheep population × LWC | 0.07           | 4  | 0.02         | 4.63   | <0.01   |
| <b>Meat hardness 1 (g)</b> | Sheep population       | 1,093,742.00   | 1  | 1,093,742.00 | 2.01   | 0.160   |
|                            | LWC                    | 3,357,320.00   | 4  | 839,330.00   | 1.54   | 0.197   |
|                            | Sheep population × LWC | 3,412,780.00   | 4  | 853,195.00   | 1.57   | 0.190   |
| <b>Meat hardness 2 (g)</b> | Sheep population       | 752,817.00     | 1  | 752,817.00   | 2.46   | 0.120   |
|                            | LWC                    | 1,867,845.00   | 4  | 466,961.00   | 1.53   | 0.202   |
|                            | Sheep population × LWC | 1,826,880.00   | 4  | 456,720.00   | 1.49   | 0.211   |
| <b>Meat springiness</b>    | Sheep population       | 0.00           | 1  | 0.00         | 0.45   | 0.506   |
|                            | LWC                    | 0.07           | 4  | 0.02         | 2.01   | 0.100   |
|                            | Sheep population × LWC | 0.14           | 4  | 0.03         | 3.77   | <0.01   |
| <b>Meat chewiness</b>      | Sheep population       | 260,012.00     | 1  | 260,012.00   | 3.58   | 0.062   |
|                            | LWC                    | 568,876.00     | 4  | 142,219.00   | 1.96   | 0.108   |
|                            | Sheep population × LWC | 552,548.00     | 4  | 138,137.00   | 1.90   | 0.117   |

**Table S1b.** Effects of sheep population (fat-tailed or thin-tailed sheep), sex and their interaction on studied traits, as estimated based on two-way ANOVA.

| Trait                    | Effect                 | Sum of squares | df | Mean Square | F     | P-value |
|--------------------------|------------------------|----------------|----|-------------|-------|---------|
| <b>Wither height (m)</b> | Sheep population       | 0.01           | 1  | 0.01        | 1.02  | 0.314   |
|                          | Sex                    | 0.06           | 1  | 0.06        | 4.97  | <0.05   |
|                          | Sheep population × Sex | 0.00           | 1  | 0.00        | 0.29  | 0.594   |
| <b>Lightness - L*</b>    | Sheep population       | 13.40          | 1  | 13.40       | 1.61  | 0.208   |
|                          | Sex                    | 64.00          | 1  | 64.03       | 7.69  | <0.01   |
|                          | Sheep population × Sex | 1.30           | 1  | 1.29        | 0.16  | 0.695   |
| <b>Redness - a*</b>      | Sheep population       | 4.01           | 1  | 4.01        | 1.93  | 0.169   |
|                          | Sex                    | 12.79          | 1  | 12.79       | 6.14  | <0.05   |
|                          | Sheep population × Sex | 8.40           | 1  | 8.40        | 4.03  | <0.05   |
| <b>Yellowness - b*</b>   | Sheep population       | 0.03           | 1  | 0.03        | 0.03  | 0.866   |
|                          | Sex                    | 13.40          | 1  | 13.40       | 12.46 | <0.001  |

|                          |                        |       |   |       |      |       |
|--------------------------|------------------------|-------|---|-------|------|-------|
|                          | Sheep population × Sex | 2.24  | 1 | 2.24  | 2.08 | 0.153 |
| <b>Chroma</b>            | Sheep population       | 3.65  | 1 | 3.65  | 1.49 | 0.226 |
|                          | Sex                    | 19.85 | 1 | 19.85 | 8.07 | <0.01 |
|                          | Sheep population × Sex | 10.76 | 1 | 10.76 | 4.37 | <0.05 |
| <b>Hue angle</b>         | Sheep population       | 0.00  | 1 | 0.00  | 0.95 | 0.331 |
|                          | Sex                    | 0.04  | 1 | 0.04  | 9.39 | <0.01 |
|                          | Sheep population × Sex | 0.00  | 1 | 0.00  | 0.31 | 0.577 |
| <b>Meat springiness</b>  | Sheep population       | 0.00  | 1 | 0.00  | 0.38 | 0.540 |
|                          | Sex                    | 0.00  | 1 | 0.00  | 0.01 | 0.914 |
|                          | Sheep population × Sex | 0.00  | 1 | 0.00  | 0.05 | 0.833 |
| <b>Meat cohesiveness</b> | Sheep population       | 0.00  | 1 | 0.00  | 0.63 | 0.428 |
|                          | Sex                    | 0.00  | 1 | 0.00  | 0.00 | 0.973 |
|                          | Sheep population × Sex | 0.01  | 1 | 0.01  | 3.10 | 0.082 |

**Table S2a.** Effects of sheep population (fat-tailed or thin-tailed sheep), live-weight category (LWC) and their interaction on studied traits, as estimated by Scheirer-Ray-Hare tests.

| Trait                          | Effect                 | Sum of squares | df | H      | P-value |
|--------------------------------|------------------------|----------------|----|--------|---------|
| <b>Live weight (kg)</b>        | Sheep population       | 502.00         | 1  | 0.10   | 0.750   |
|                                | LWC                    | 1,142,662.00   | 4  | 231.27 | <0.001  |
|                                | Sheep population × LWC | 1,763.00       | 4  | 0.36   | 0.986   |
| <b>Carcass length (m)</b>      | Sheep population       | 3,205.00       | 1  | 0.78   | 0.376   |
|                                | LWC                    | 787,969.00     | 4  | 192.88 | <0.001  |
|                                | Sheep population × LWC | 3,916.00       | 4  | 0.96   | 0.916   |
| <b>Hot carcass weight (kg)</b> | Sheep population       | 786.00         | 1  | 0.16   | 0.690   |
|                                | LWC                    | 1,093,735.00   | 4  | 221.39 | <0.001  |
|                                | Sheep population × LWC | 4,598.00       | 4  | 0.93   | 0.920   |
| <b>Carcass yield (%)</b>       | Sheep population       | 36,751.00      | 1  | 7.44   | <0.01   |
|                                | LWC                    | 705,885.00     | 4  | 142.86 | <0.001  |
|                                | Sheep population × LWC | 18,032.00      | 4  | 3.65   | 0.456   |
| <b>Carcass pH</b>              | Sheep population       | 5,824.00       | 1  | 1.28   | 0.257   |
|                                | LWC                    | 48,815.00      | 4  | 10.75  | <0.05   |
|                                | Sheep population × LWC | 44,529.00      | 4  | 9.80   | <0.05   |
| <b>Lightness - L*</b>          | Sheep population       | 816.00         | 1  | 0.97   | 0.325   |
|                                | LWC                    | 32,178.00      | 4  | 38.23  | <0.001  |
|                                | Sheep population × LWC | 1,088.00       | 4  | 1.29   | 0.863   |
| <b>Redness - a*</b>            | Sheep population       | 3,560.00       | 1  | 4.23   | <0.05   |
|                                | LWC                    | 2,439.00       | 4  | 2.90   | 0.575   |
|                                | Sheep population × LWC | 1,927.00       | 4  | 2.29   | 0.683   |
| <b>Chroma</b>                  | Sheep population       | 2,464.00       | 1  | 2.93   | 0.087   |
|                                | LWC                    | 2,375.00       | 4  | 2.82   | 0.588   |

|                          |                        |           |   |       |       |
|--------------------------|------------------------|-----------|---|-------|-------|
|                          | Sheep population × LWC | 2,061.00  | 4 | 2.45  | 0.654 |
| <b>Meat pH</b>           | Sheep population       | 14.00     | 1 | 0.02  | 0.897 |
|                          | LWC                    | 13,493.00 | 4 | 16.07 | <0.01 |
|                          | Sheep population × LWC | 7,309.00  | 4 | 8.70  | 0.069 |
| <b>Meat cohesiveness</b> | Sheep population       | 92.00     | 1 | 0.11  | 0.738 |
|                          | LWC                    | 1,130.00  | 4 | 1.37  | 0.849 |
|                          | Sheep population × LWC | 9,767.00  | 4 | 11.84 | <0.05 |

**Table S2b.** Effects of sheep population (fat-tailed or thin-tailed sheep), sex and their interaction on studied traits, as estimated by Scheirer–Ray–Hare tests.

| Trait                                             | Effect                 | Sum of squares | df | H     | P-value |
|---------------------------------------------------|------------------------|----------------|----|-------|---------|
| <b>Live weight (kg)</b>                           | Sheep population       | 502.00         | 1  | 0.10  | 0.750   |
|                                                   | Sex                    | 36,855.00      | 1  | 7.46  | <0.01   |
|                                                   | Sheep population × Sex | 654.00         | 1  | 0.13  | 0.716   |
| <b>Carcass length (m)</b>                         | Sheep population       | 3,205.00       | 1  | 0.78  | 0.376   |
|                                                   | Sex                    | 13,545.00      | 1  | 3.32  | 0.069   |
|                                                   | Sheep population × Sex | 46.00          | 1  | 0.01  | 0.916   |
| <b>Hot carcass weight (kg)</b>                    | Sheep population       | 786.00         | 1  | 0.16  | 0.690   |
|                                                   | Sex                    | 20,769.00      | 1  | 4.20  | <0.05   |
|                                                   | Sheep population × Sex | 663.00         | 1  | 0.13  | 0.714   |
| <b>Carcass yield (%)</b>                          | Sheep population       | 36,751.00      | 1  | 7.44  | <0.01   |
|                                                   | Sex                    | 93,536.00      | 1  | 18.93 | <0.001  |
|                                                   | Sheep population × Sex | 197.00         | 1  | 0.04  | 0.842   |
| <b>Muscle fiber minimum Feret's diameter (μm)</b> | Sheep population       | 490.00         | 1  | 1.01  | 0.316   |
|                                                   | Sex                    | 2,569.00       | 1  | 5.27  | <0.05   |
|                                                   | Sheep population × Sex | 804.00         | 1  | 1.65  | 0.199   |
| <b>Carcass pH</b>                                 | Sheep population       | 5,824.00       | 1  | 1.28  | 0.257   |
|                                                   | Sex                    | 700.00         | 1  | 0.15  | 0.695   |
|                                                   | Sheep population × Sex | 21,223.00      | 1  | 4.67  | <0.05   |
| <b>Meat pH</b>                                    | Sheep population       | 14.00          | 1  | 0.02  | 0.897   |
|                                                   | Sex                    | 2,670.00       | 1  | 3.18  | 0.075   |
|                                                   | Sheep population × Sex | 128.00         | 1  | 0.15  | 0.696   |
| <b>Meat hardness 1 (g)</b>                        | Sheep population       | 1,801.00       | 1  | 2.18  | 0.140   |
|                                                   | Sex                    | 50.00          | 1  | 0.06  | 0.805   |
|                                                   | Sheep population × Sex | 292.00         | 1  | 0.35  | 0.552   |
| <b>Meat hardness 2 (g)</b>                        | Sheep population       | 1,889.00       | 1  | 2.29  | 0.130   |
|                                                   | Sex                    | 45.00          | 1  | 0.06  | 0.814   |
|                                                   | Sheep population × Sex | 385.00         | 1  | 0.47  | 0.494   |
| <b>Meat chewiness</b>                             | Sheep population       | 2,241.00       | 1  | 2.72  | 0.099   |
|                                                   | Sex                    | 173.00         | 1  | 0.21  | 0.647   |
|                                                   | Sheep population × Sex | 752.00         | 1  | 0.91  | 0.340   |

|                                     |                               |        |   |      |       |
|-------------------------------------|-------------------------------|--------|---|------|-------|
| <b>Meat moisture<br/>(%)</b>        | Sheep population              | 9.60   | 1 | 0.06 | 0.806 |
|                                     | Sex                           | 114.50 | 1 | 0.73 | 0.394 |
|                                     | Sheep population $\times$ Sex | 285.70 | 1 | 1.81 | 0.178 |
| <b>Meat lipid<br/>content (%)</b>   | Sheep population              | 224.80 | 1 | 1.43 | 0.232 |
|                                     | Sex                           | 307.50 | 1 | 1.95 | 0.163 |
|                                     | Sheep population $\times$ Sex | 16.40  | 1 | 0.10 | 0.747 |
| <b>Meat protein<br/>content (%)</b> | Sheep population              | 13.80  | 1 | 0.09 | 0.768 |
|                                     | Sex                           | 94.20  | 1 | 0.60 | 0.439 |
|                                     | Sheep population $\times$ Sex | 76.80  | 1 | 0.49 | 0.485 |
